# Supplementary material for: Data Curation can Improve the Prediction Accuracy of Metabolic Intrinsic Clearance
Source: PubMed Central journal article supplement (PMC6586005; doi:10.1002/minf.201800086), 2018-09-24
Supplement: MINF-38-na-s001.pdf [file MINF-38-na-s001.pdf]

## Supporting Information

# Data curation can improve the prediction accuracy of metabolic intrinsic clearance

Tsuyoshi Esaki,<sup>\*,[a]</sup> Reiko Watanabe,<sup>[a]</sup> Hitoshi Kawashima,<sup>[a]</sup> Rikiya Ohashi,<sup>[a],[b]</sup> Yayoi

Natsume-Kitatani,<sup>[a],[c]</sup> Chioko Nagao,<sup>[a],[c]</sup> Kenji Mizuguchi,<sup>\*,[a],[c]</sup>

<sup>[a]</sup>Laboratory of Bioinformatics, National Institutes of Biomedical Innovation, Health and Nutrition, 7-6-8 Saito-Asagi, Ibaraki, Osaka 567-0085, Japan

<sup>[b]</sup>Discovery Technology Laboratories, Mitsubishi Tanabe Pharma Corporation, 2-2-50 Kawagishi, Toda, Saitama 335-8505, Japan

<sup>[c]</sup>Laboratory of In-silico Drug Design, Center for Drug Design Research, National Institutes of Biomedical Innovation, Health and Nutrition, 7-6-8 Saito-Asagi, Ibaraki, Osaka 567-0058, Japan

S-1. Title page

S-2. Automated initial processing.

S-3. Confusion matrix and equations for performance metrics.

S-4. Performance of models trained on the sampled non-curved data set.

S-5. Detailed prediction results of models trained on the sampled non-curved data set.

### Automated initial processing

| <b>Relation</b>  | <b>Value<br/>(<math>\mu\text{L}/\text{min}/\text{mg}</math>)</b> | <b>Category</b> | <b>Number of entries in<br/>Non-curated dataset</b> | <b>Number of entries in<br/>Curated dataset</b> |
|------------------|------------------------------------------------------------------|-----------------|-----------------------------------------------------|-------------------------------------------------|
| < or $\leq$      | 0–20                                                             | Stable          | 457                                                 | 901                                             |
| =                | 0–20                                                             | Stable          | 1,318                                               | 1,496                                           |
| >                | 0–20                                                             | Removed         | 16                                                  | 9                                               |
| < or $\leq$      | 20–300                                                           | Removed         | 1,074                                               | 77                                              |
| =                | 20–300                                                           | Moderate        | 2,174                                               | 2,621                                           |
| >                | 20–300                                                           | Removed         | 24                                                  | 59                                              |
| <                | 300~                                                             | Removed         | 233                                                 | 9                                               |
| =                | 300~                                                             | Unstable        | 3,685                                               | 302                                             |
| >                | 300~                                                             | Unstable        | 367                                                 | 107                                             |
| Removed entries  |                                                                  |                 | 1,347                                               | 154                                             |
| Retained entries |                                                                  |                 | 8,001                                               | 5,427                                           |
| Total            |                                                                  |                 | 9,348<br>(8,741 compounds)                          | 5,581<br>(5,443 compounds)                      |

Automated initial processing of the entries in the non-curated and curated datasets. The grayed cells indicate the entries that have been removed. The sums of the white cells represent the number of entries in each category in each dataset.

## Confusion matrix and equations for performance metrics

|          |          | Predicted                |                            |                            |
|----------|----------|--------------------------|----------------------------|----------------------------|
|          |          | Stable                   | Moderate                   | Unstable                   |
| Observed | Stable   | True Stable<br><b>A</b>  | False Moderate<br><b>B</b> | False Unstable<br><b>C</b> |
|          | Moderate | False Stable<br><b>D</b> | True Moderate<br><b>E</b>  | False Unstable<br><b>F</b> |
|          | Unstable | False Stable<br><b>G</b> | False Moderate<br><b>H</b> | True Unstable<br><b>I</b>  |

| Measure                    | Calculation                                                                                                                                                                                                                                                                                                                     |
|----------------------------|---------------------------------------------------------------------------------------------------------------------------------------------------------------------------------------------------------------------------------------------------------------------------------------------------------------------------------|
| Specificity                | Stable $\frac{E + F + H + I}{D + E + F + G + H + I}$ , Moderate $\frac{A + C + G + I}{A + B + C + G + H + I}$ , Unstable $\frac{A + B + D + E}{A + B + C + D + E + F}$                                                                                                                                                          |
| Positive Predicted Value   | Stable $\frac{A}{A + D + G}$ , Moderate $\frac{E}{B + E + H}$ , Unstable $\frac{I}{C + F + I}$                                                                                                                                                                                                                                  |
| Negative Predicted Value   | Stable $\frac{E + F + H + I}{B + C + E + F + H + I}$ , Moderate $\frac{D + G + F + I}{A + D + G + C + F + I}$ , Unstable $\frac{A + B + D + E}{A + D + G + B + E + H}$                                                                                                                                                          |
| Sensitivity (Recall)       | Stable $\frac{A}{A + B + C}$ , Moderate $\frac{E}{D + E + F}$ , Unstable $\frac{I}{G + H + I}$                                                                                                                                                                                                                                  |
| F-measure (for class $i$ ) | $\frac{2(\text{Sensitivity}_i \times \text{Precision}_i)}{\text{Sensitivity}_i + \text{Precision}_i}$                                                                                                                                                                                                                           |
| Balanced Accuracy          | Stable $\frac{1}{2} \left( \frac{A}{A + B + C} + \frac{E + F + H + I}{D + E + F + G + H + I} \right)$ ,<br>Moderate $\frac{1}{2} \left( \frac{E}{D + E + F} + \frac{A + C + G + I}{A + B + C + G + H + I} \right)$ ,<br>Unstable $\frac{1}{2} \left( \frac{I}{G + H + I} + \frac{A + B + D + E}{A + B + C + D + E + F} \right)$ |
| Accuracy                   | $\frac{A + E + I}{A + B + C + D + E + F + G + H + I}$                                                                                                                                                                                                                                                                           |
| Kappa                      | $\frac{\text{Accuracy} - E}{1 - E}$                                                                                                                                                                                                                                                                                             |
| E                          | $\frac{(A + B + C)(A + D + G) + (D + E + F)(B + E + H) + (G + H + I)(C + F + I)}{(A + B + C + D + E + F + G + H + I)^2}$                                                                                                                                                                                                        |

The upper table explains a confusion matrix, where A to I represent the number of instances. The lower table shows equations for the performance metrics, calculated based on the confusion matrix<sup>1</sup>.

<sup>1</sup> Sokolova, M.; Lapalme, G. A systematic analysis of performance measures for classification tasks. *Inf. Process. Manag.* **2009**, *45*, 427-437.

**Performance of models trained on the sampled non-curated data set.**

|                  | Training data                  | Method     | Accuracy | Kappa |
|------------------|--------------------------------|------------|----------|-------|
| Cross validation | Reconstructed non-curated data | RF         | 0.744    | 0.526 |
|                  |                                | AB         | 0.740    | 0.517 |
|                  |                                | Radial SVM | 0.754    | 0.556 |
|                  |                                | Linear SVM | 0.687    | 0.453 |
| Test set         | Reconstructed non-curated data | RF         | 0.573    | 0.192 |
|                  |                                | AB         | 0.563    | 0.174 |
|                  |                                | Radial SVM | 0.548    | 0.216 |
|                  |                                | Linear SVM | 0.528    | 0.153 |

A sampled non-curated dataset (stable: 1,486 compounds (43.39%), moderate: 1,674 compounds (48.88%), unstable: 265 compounds (7.73%)) was prepared by randomly sampling the non-curated training set to make its class distribution nearly identical to that of the curated training set. The cross-validation results were similar to those for the models trained on the original (unsampled) non-curated training set. While the performance scores on the test set improved, they were still worse than those produced by the models trained on the curated data (Table 1).

Detailed prediction results of models trained on the sampled non-curved data set.

| Reconstructed non-curved |          |          | Predicted |          |          | Critical mis-prediction (%) |
|--------------------------|----------|----------|-----------|----------|----------|-----------------------------|
|                          |          |          | Stable    | Moderate | Unstable |                             |
| RF                       | Observed | Stable   | 103       | 138      | 3        | 1.18                        |
|                          |          | Moderate | 69        | 231      | 2        |                             |
|                          |          | Unstable | 4         | 37       | 6        |                             |
| AB                       | Observed | Stable   | 106       | 138      | 0        | 0.51                        |
|                          |          | Moderate | 78        | 221      | 3        |                             |
|                          |          | Unstable | 2         | 38       | 7        |                             |
| Radial SVM               | Observed | Stable   | 119       | 114      | 11       | 2.87                        |
|                          |          | Moderate | 69        | 188      | 45       |                             |
|                          |          | Unstable | 6         | 23       | 18       |                             |
| Linear SVM               | Observed | Stable   | 107       | 130      | 7        | 2.19                        |
|                          |          | Moderate | 79        | 194      | 29       |                             |
|                          |          | Unstable | 6         | 29       | 12       |                             |

The confusion matrix shows the prediction results of the models trained on the sampled non-curved dataset. The AB model showed an improved mis-prediction ratio but RF, Radial SVM and Linear SVM model produced worse results (compared with Table 3).
